# Supplementary material for: Minimal residual disease assessment by multiparameter flow cytometry in transplant-eligible myeloma in the EMN02/HOVON 95 MM trial
Source: Springer Nature journal article supplement (doi:10.1038/s41408-021-00498-0), 2021-06-03

## Supplementary Material

### Flow panels in the 3 laboratories:

- **Turin:**

tube 1: CD81FITC/CD27PE/CD138PC5.5/CD19PE-Cy7/CD20APC/CD38PB/CD45KO;

tube 2: cyKappaFITC/cyLambdaPE/CD138PC5.5/CD19PE-Cy7/CD56APC/CD117APC-A750/CD38PB/CD45KO)

- **Brno:**

tube 1: CD81APC-H7/CD27PerCP-Cy5.5/CD138PO/CD19PE-Cy7/ CD28PE/CD38FITC/CD45PB/CD117APC;

tube 2: cyKappaAPC/cyLambdaAPC-H7/CD138PO/CD19PE-Cy7/ CD56PE/CD38FITC/CD45PB/ $\beta$ 2micro-APC

- **Rotterdam:**

tube 1: CD81APC-H7/CD27PerCP-Cy5.5/CD138PO/CD19PE-Cy7/ CD28PE/CD38FITC/CD45PB/CD117APC;

tube 2: cyKappaAPC/cyLambdaAPC-C750/CD138PO/CD19PE-Cy7/ CD56PE/CD38FITC/CD45PB/ $\beta$ 2micro-APC)

**Supplementary Table 1. Overall correlation among 100 FACS files in the 3 laboratories**

|     | Neg | Pos |
|-----|-----|-----|
| Neg | 136 | 18  |
| Pos | 11  | 133 |

**Supplementary Table 2. Baseline characteristics of MRD evaluable-CR patients vs MRD not evaluable-CR patients**

|                                    | MRD-CR<br>N=248                       | No MRD-CR<br>N=250 | P value |
|------------------------------------|---------------------------------------|--------------------|---------|
| <b>Age (years)</b>                 |                                       |                    |         |
| Median (IQR)                       | 57 (52 - 62)                          | 57 (53 - 62)       | 0.73    |
| <b>Gender, N (%)</b>               |                                       |                    |         |
| Male                               | 137 (55)                              | 128 (51)           | 0.37    |
| <b>ISS, N (%)</b>                  |                                       |                    |         |
| I                                  | 112 (45)                              | 103 (41)           | 0.31    |
| II                                 | 99 (40)                               | 97 (39)            |         |
| III                                | 37 (15)                               | 50 (20)            |         |
| <b>R-ISS, N (%)</b>                |                                       |                    |         |
| I                                  | 67 (30)                               | 47 (23)            | 0.26    |
| II                                 | 141 (63)                              | 139 (68)           |         |
| III                                | 15 (7)                                | 17 (8)             |         |
| missing                            | 25                                    | 47                 |         |
| <b>LDH, N (%)</b>                  |                                       |                    |         |
| > ULN                              | 33 (14)                               | 30 (13)            | 0.89    |
| Missing data N (%)                 | 13                                    | 24                 |         |
| <b>Cytogenetic features, N (%)</b> |                                       |                    |         |
| Deletion 17p                       | 19 (9)                                | 21 (11)            | 0.50    |
| Translocation (4;14)               | 31 (15)                               | 20 (10)            | 0.23    |
| Translocation (14;16)              | 9 (4)                                 | 8 (4)              | 1       |
| High risk                          | 52 (25)                               | 45 (25)            | 0.90    |
| <b>Random, N (%)</b>               |                                       |                    |         |
| no ASCT                            | 94 (38)                               | 105 (42)           | 0.36    |
| ASCT                               | 154 (62)                              | 145 (58)           |         |
| <b>PFS*(HR 95% CI)</b>             | MRD-CR vs No MRD CR: 0.91 (0.69-1.20) |                    | 0.51    |
| <b>OS*(HR 95% CI)</b>              | MRD-CR vs No MRD CR: 1.01 (0.65-1.58) |                    | 0.95    |

ISS, International Staging System. R-ISS, Revised International Staging System. LDH, lactate dehydrogenase. ASCT, autologous stem-cell transplantation. MRD, minimal residual disease. CR, complete response. PFS, progression-free survival. OS, overall survival. HR, hazard ratio. CI, confidence interval. \*MRD-CR vs no MRD-CR.

**Supplementary Table 3. Multivariate Cox analysis**

|                           | Progression-free survival |           |               |                | Overall survival |                        |                     |                |
|---------------------------|---------------------------|-----------|---------------|----------------|------------------|------------------------|---------------------|----------------|
| <b>Pre-maintenance</b>    |                           | <b>HR</b> | <b>95% CI</b> | <b>p value</b> |                  | <b>HR</b>              | <b>95% CI</b>       | <b>p value</b> |
|                           | MRD status: neg vs pos    | 0.39      | (0.28 - 0.56) | <0.001         |                  | MRD status: neg vs pos | 0.51 (0.31 - 0.85)  | 0.01           |
|                           | FISH: High vs Standard    | 2.35      | (1.61 - 3.44) | <0.001         |                  | FISH: High vs Standard | 2.46 (1.46 - 4.13)  | <0.001         |
|                           | ISS: II vs I              | 1.48      | (1.04 - 2.11) | 0.031          |                  | ISS: II vs I           | 2.09 (1.17 - 3.71)  | 0.012          |
|                           | ISS: III vs I             | 1.86      | (1.18 - 2.93) | 0.007          |                  | ISS: III vs I          | 3.74 (1.96 - 7.13)  | <0.001         |
|                           | LDH: >ULN vs ≤ULN         | 1.39      | (0.91 - 2.13) | 0.129          |                  | LDH: >ULN vs ≤ULN      | 1.4 (0.78 - 2.52)   | 0.254          |
|                           | age: ≥60 vs <60           | 1.07      | (0.78 - 1.48) | 0.67           |                  | age: ≥60 vs <60        | 0.95 (0.59 - 1.54)  | 0.834          |
| <b>1-year maintenance</b> |                           | <b>HR</b> | <b>95% CI</b> | <b>p value</b> |                  | <b>HR</b>              | <b>95% CI</b>       | <b>p value</b> |
|                           | MRD status: neg vs pos    | 0.32      | (0.16 - 0.62) | <0.001         |                  | MRD status: neg vs pos | 0.37 (0.12 - 1.14)  | 0.082          |
|                           | FISH: High vs Standard    | 3.65      | (1.68 - 7.92) | 0.001          |                  | FISH: High vs Standard | 4.51 (1.25 - 16.29) | 0.022          |
|                           | ISS: II vs I              | 1.29      | (0.62 - 2.68) | 0.503          |                  | ISS: II vs I           | 2.93 (0.78 - 11.06) | 0.112          |
|                           | ISS: III vs I             | 2.12      | (0.94 - 4.79) | 0.070          |                  | ISS: III vs I          | 5.26 (1.21 - 22.87) | 0.027          |
|                           | LDH: >ULN vs ≤ULN         | 1.19      | (0.49 - 2.87) | 0.703          |                  | LDH: >ULN vs ≤ULN      | 0.84 (0.19 - 3.76)  | 0.818          |
|                           | age: ≥60 vs <60           | 1.90      | (1.06 - 3.41) | 0.032          |                  | age: ≥60 vs <60        | 1.98 (0.70 - 5.57)  | 0.196          |

Adjusted for sex.

MRD, minimal residual disease; FISH, fluorescence in situ hybridization; ISS, International Staging System; LDH, lactate dehydrogenase; ULN, upper limit of normal; ITT, intention to treat.

## Supplementary Figures

**Figure 1.** A) Progression-free survival in the pre-maintenance population (suspected CR). B) Overall survival in the pre-maintenance population (suspected CR).

A)

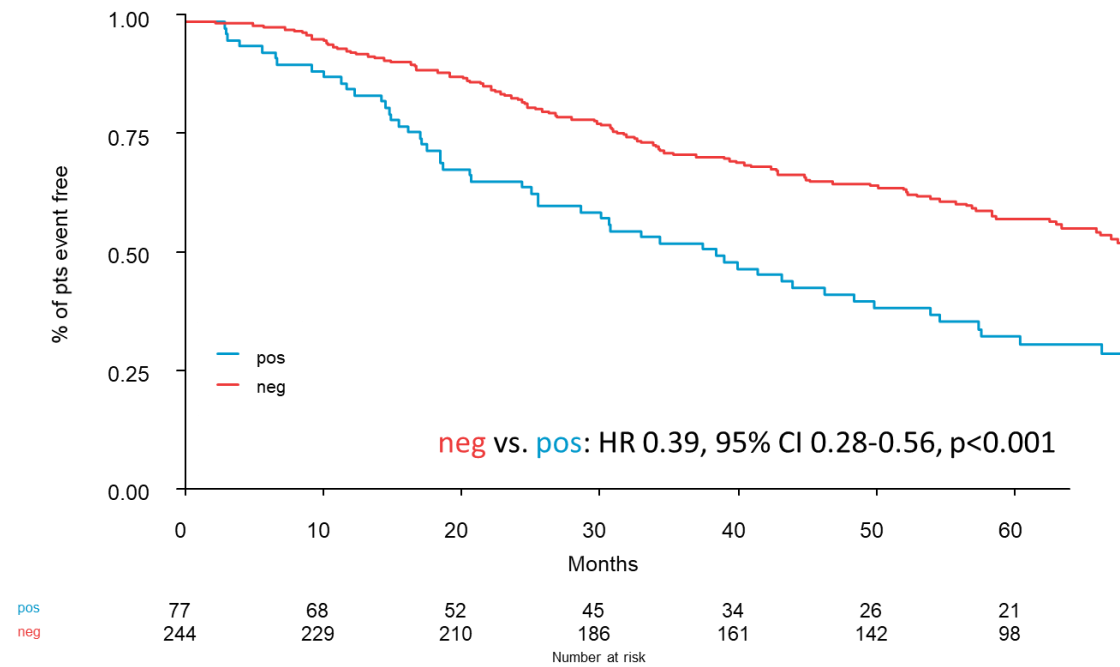

B)

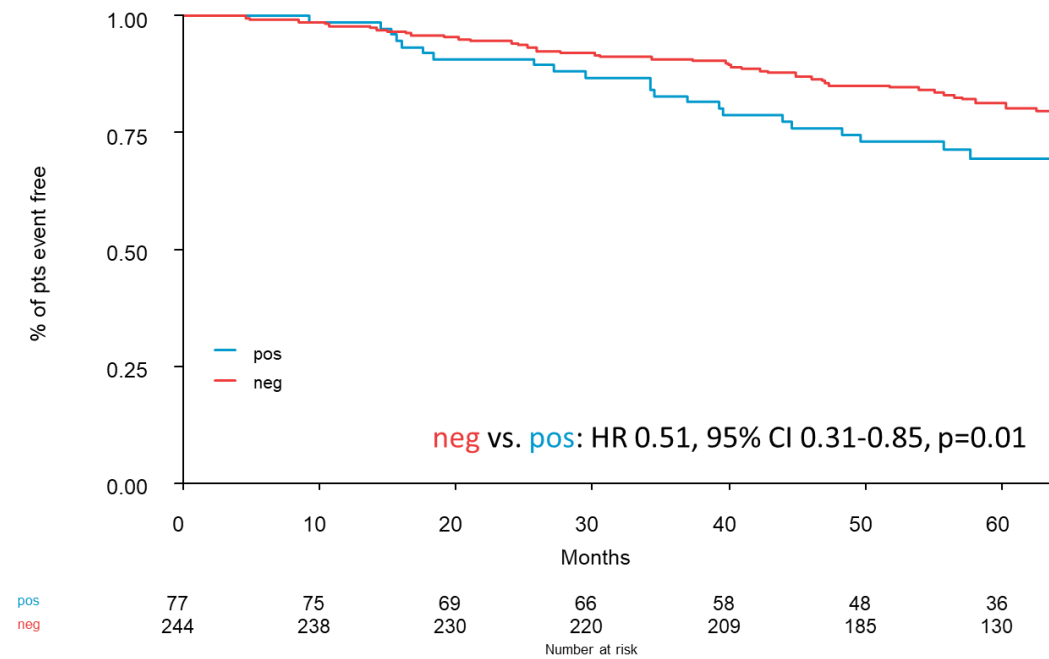

**Figure 2.** A) Subgroup analysis (pre-maintenance) of progression-free survival. B) Subgroup analysis (pre-maintenance) of overall survival.

A)

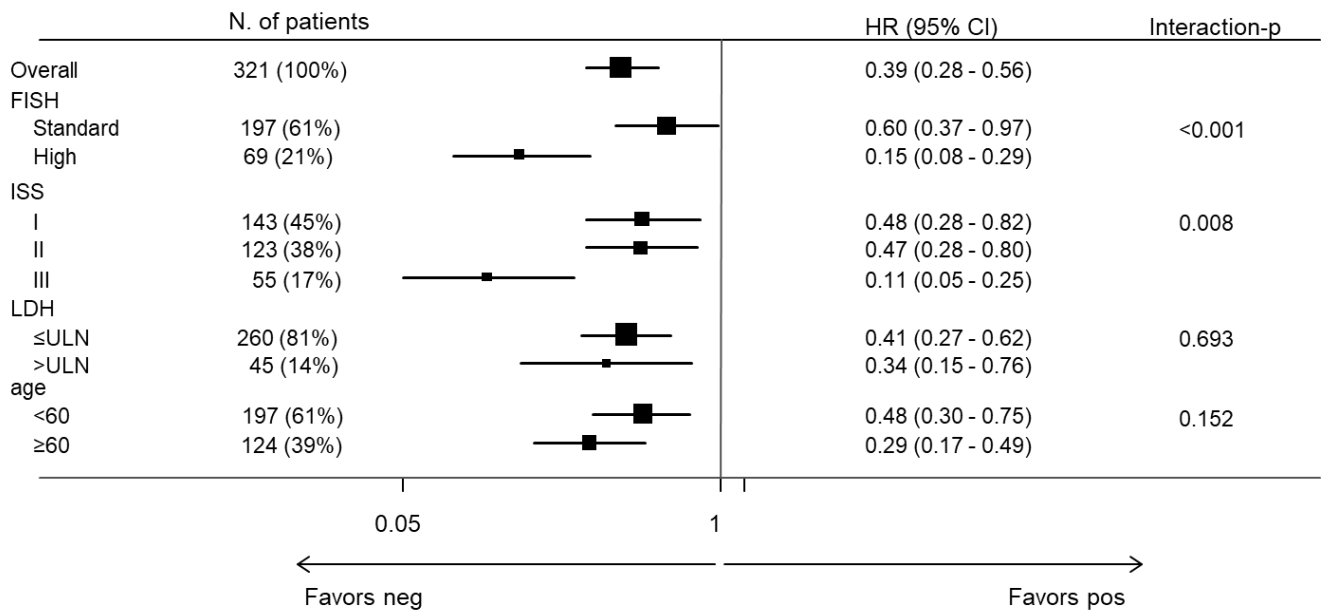

B)

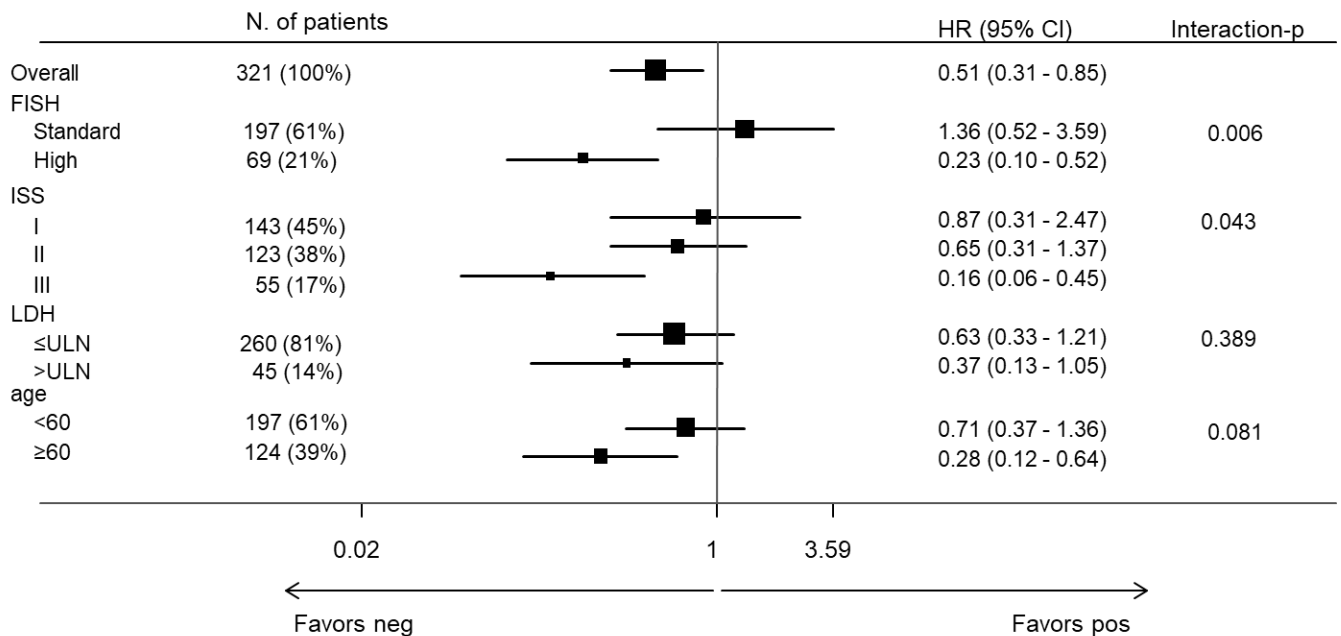

FISH, fluorescence in situ hybridization; ISS, International Staging System; LDH, lactate dehydrogenase; ULN, upper limit of normal.

**Figure 3.** Outcome in the pre-maintenance MRD population with high-risk features:  
 A) Progression-free survival in high-risk patients by FISH. B) Overall survival in high-risk patients by FISH. C) Progression-free survival in ISS stage III patients. D) Overall survival in ISS stage III patients.

A)

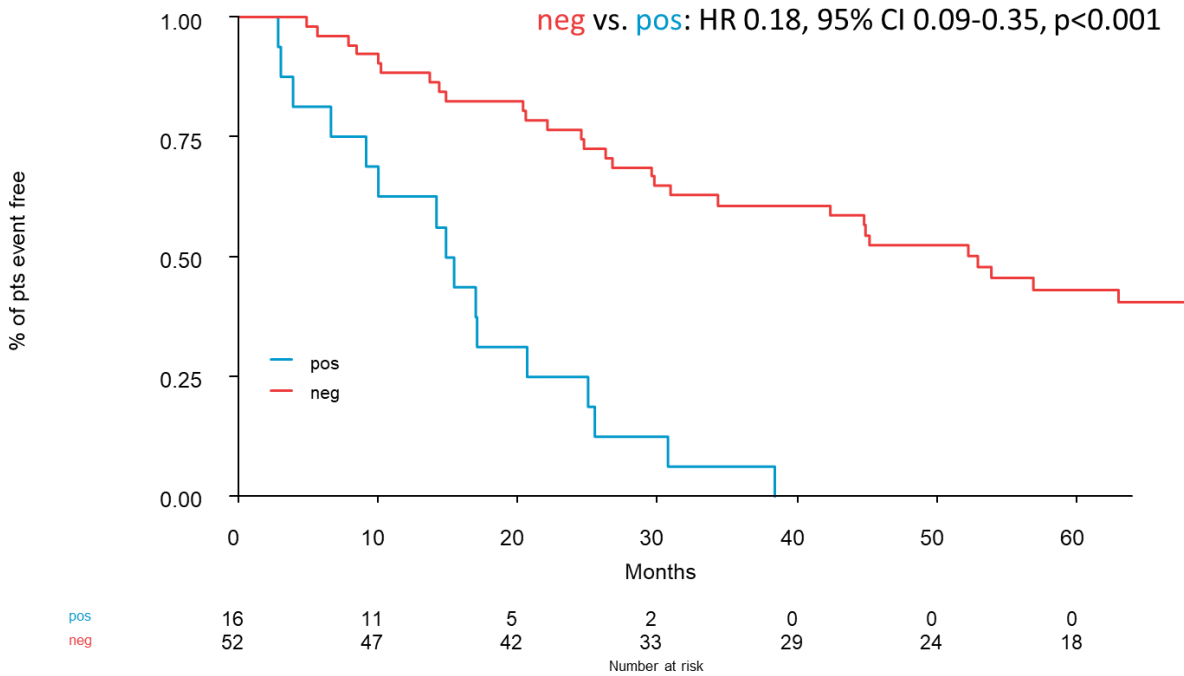

B)

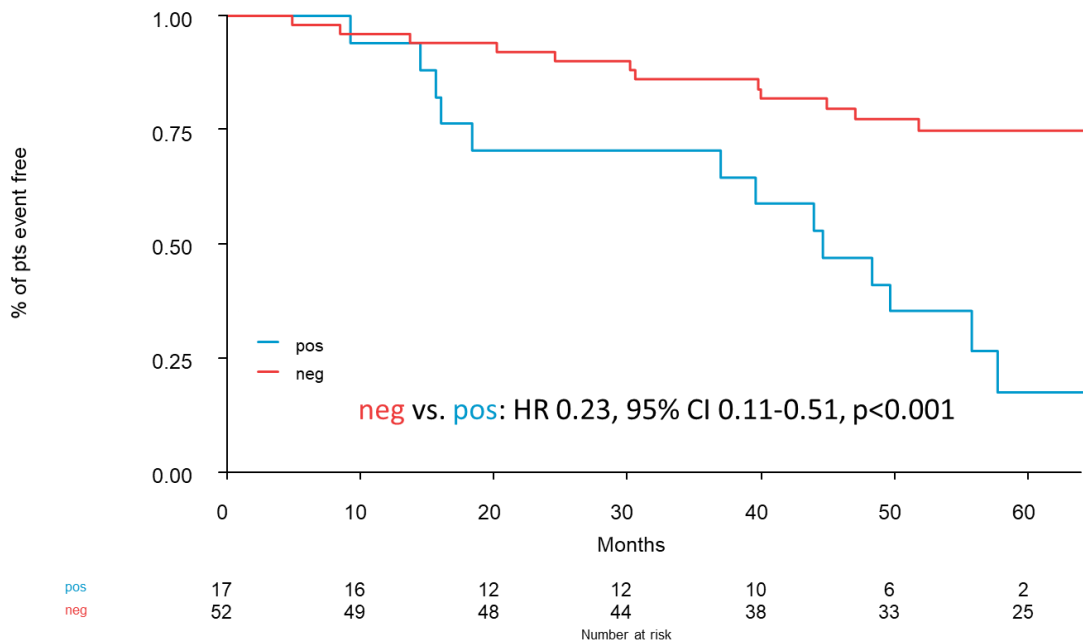

C)

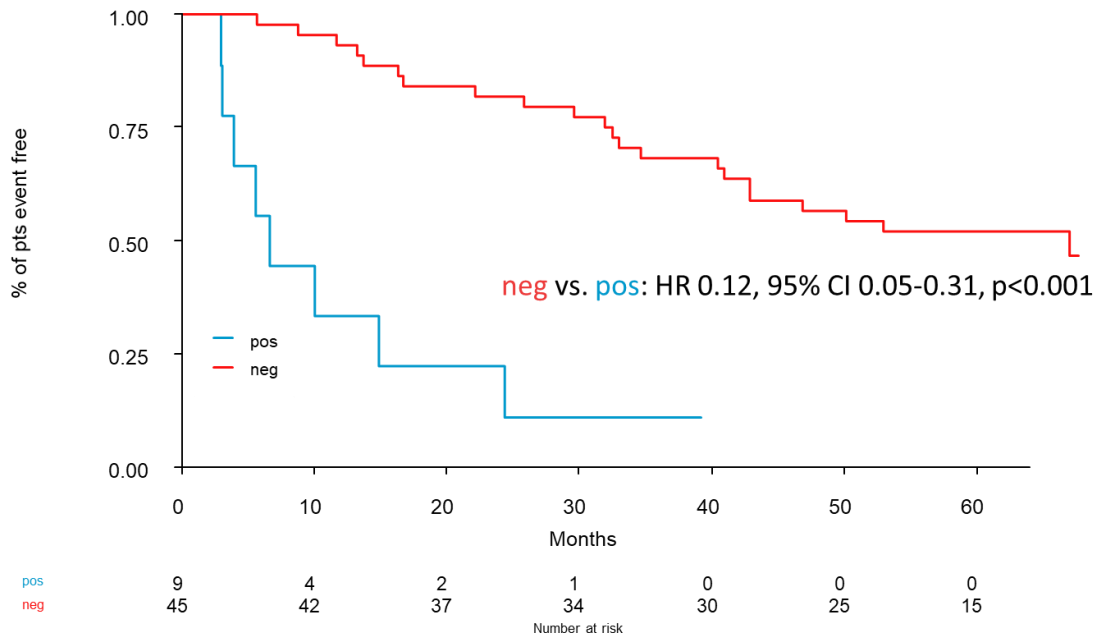

D)

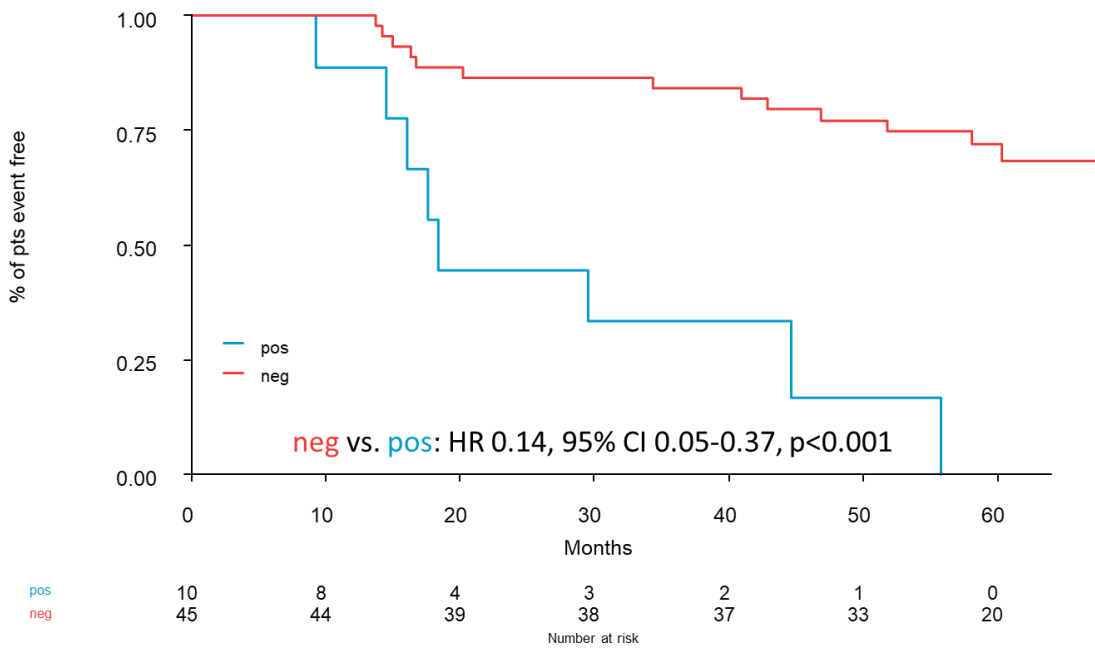

**Figure 4.** Outcome of patients with sustained MRD negativity

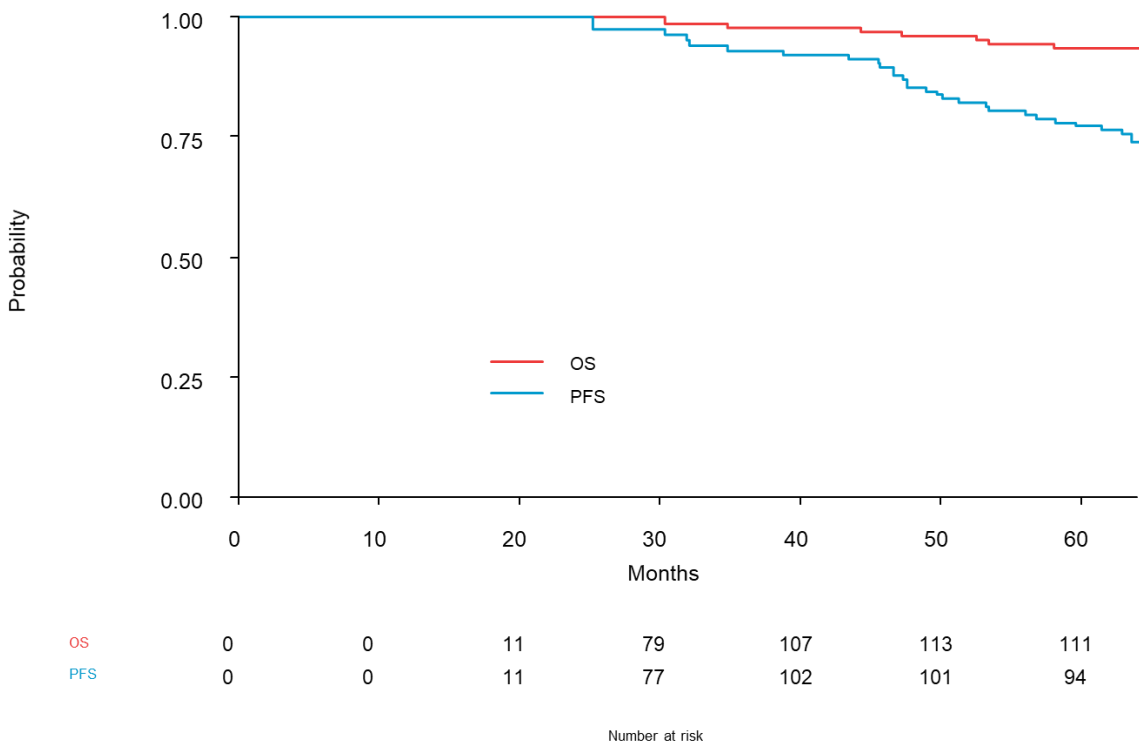



**Figure 5.** A) Progression-free survival in the 1-year lenalidomide maintenance MRD population. B) Overall survival in the 1-year lenalidomide maintenance MRD population

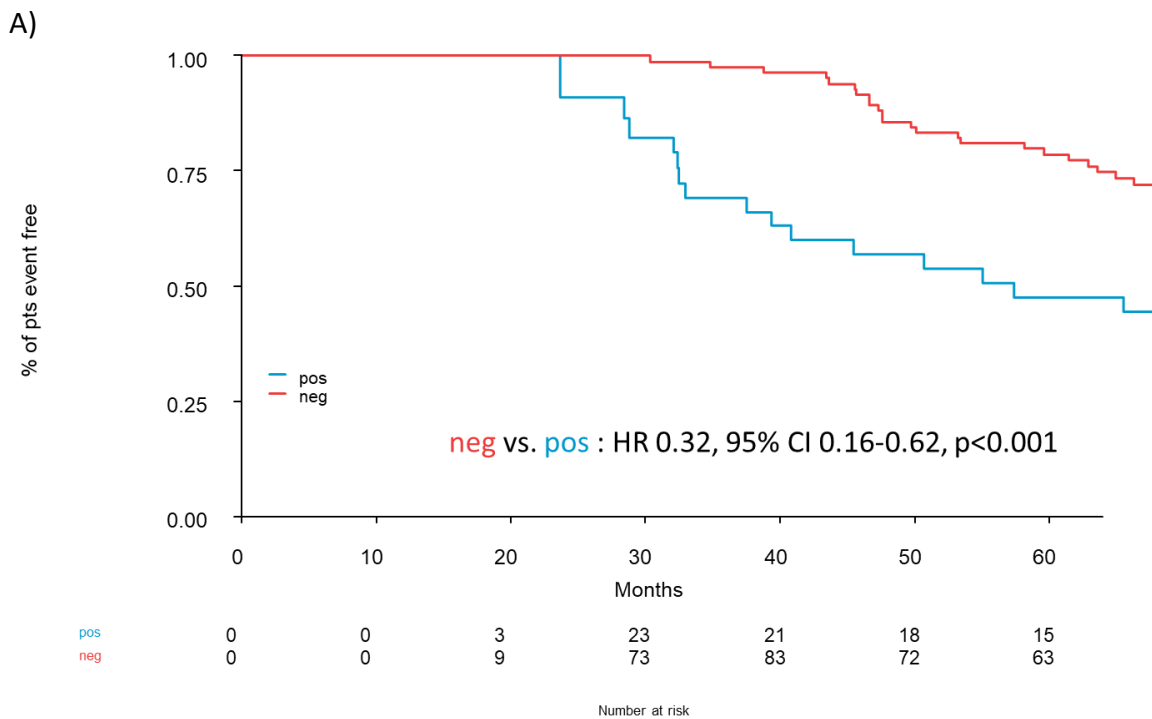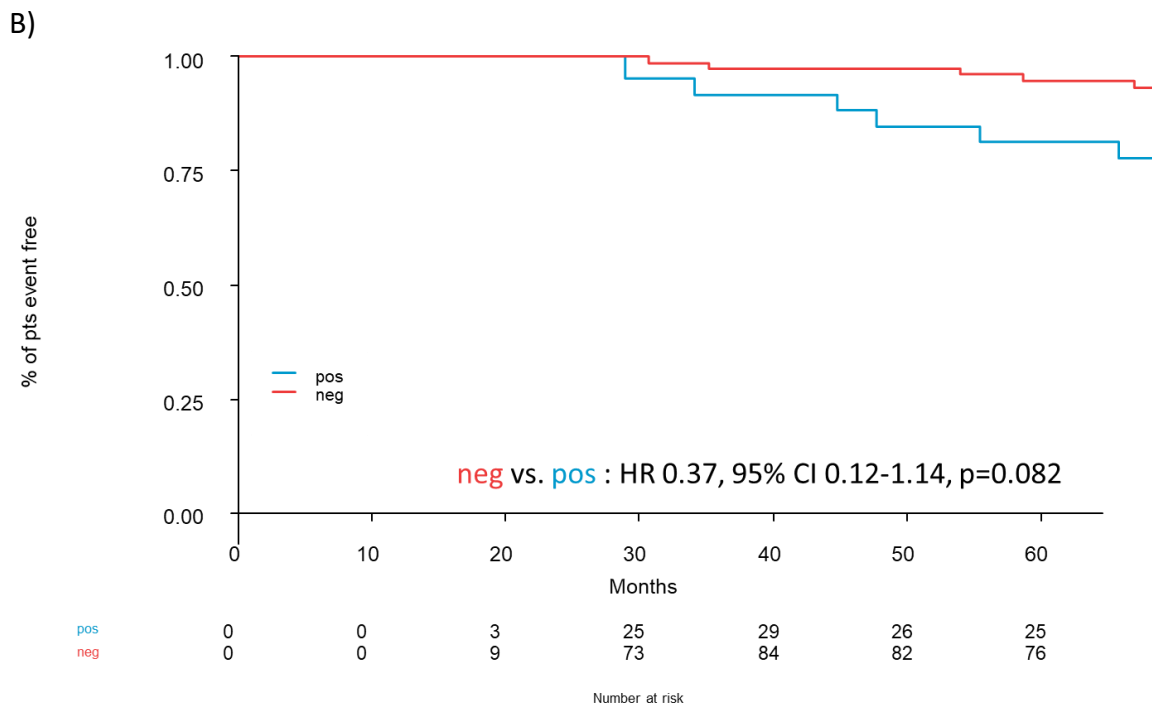

**Figure 6.** Progression-free survival according to MRD conversion in the 1-year lenalidomide maintenance MRD population.

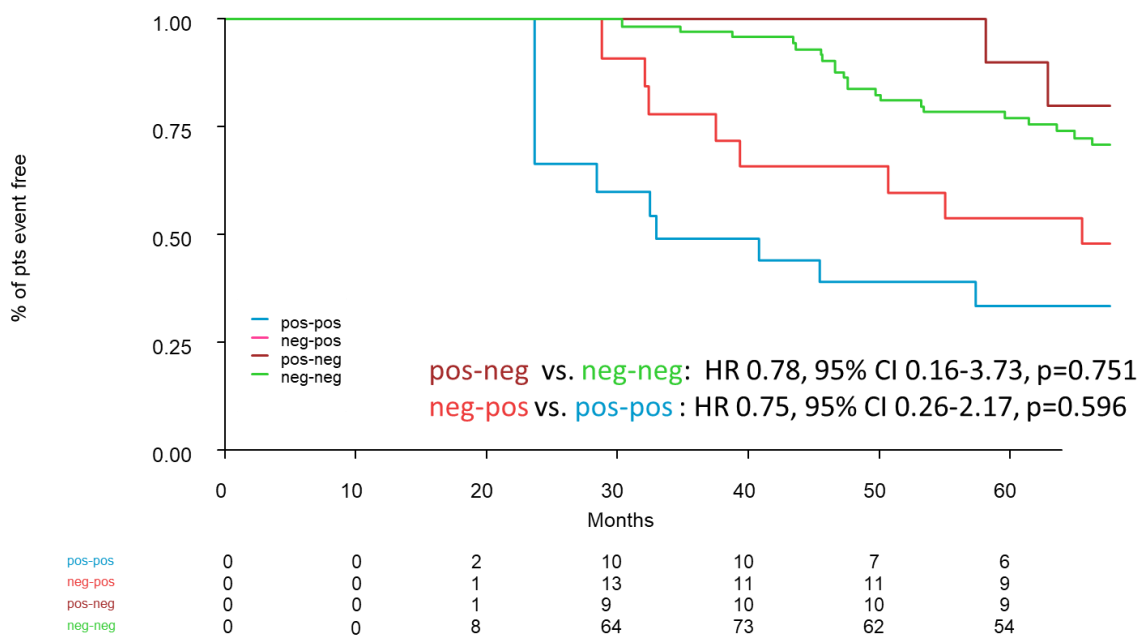

Supplement: MOESM1 [file 41408_2021_498_MOESM1_ESM.pdf]
